# Supplementary material for: Impact of a Specific Amino Acid Composition with Micronutrients on Well-Being in Subjects with Chronic Psychological Stress and Exhaustion Conditions: A Pilot Study
Source: MDPI journal article supplement (doi:10.3390/nu10050551), 2018-04-29
Supplement: s1 [file s1]

**Table S1.** Values of the PSQ<sub>30</sub> before and during the dietary intervention

|                                         | Verum group ( <i>n</i> = 29) <sup>1</sup><br>mean ± SD<br>median<br>(Q1/Q3) |                                    |                                    |                                          |                                          | Placebo group ( <i>n</i> = 30) <sup>1</sup><br>mean ± SD<br>median<br>(Q1/Q3) |                                       |                                    |                                        |                                          | V vs. P<br><i>p</i> -Value <sup>b</sup> |             |
|-----------------------------------------|-----------------------------------------------------------------------------|------------------------------------|------------------------------------|------------------------------------------|------------------------------------------|-------------------------------------------------------------------------------|---------------------------------------|------------------------------------|----------------------------------------|------------------------------------------|-----------------------------------------|-------------|
|                                         | Baseline                                                                    | Week 8                             | Week 12                            | Difference<br>8 weeks                    | Difference<br>12 weeks                   | Baseline                                                                      | Week 8                                | Week 12                            | Difference<br>8 weeks                  | Difference<br>12 weeks                   | 8<br>weeks                              | 12<br>weeks |
| <b>Total<br/>PSQ<sub>30</sub> score</b> | 0.67 ± 0.12<br>0.66<br>(0.56/0.79)                                          | 0.54 ± 0.16<br>0.51<br>(0.44/0.69) | 0.48 ± 0.16<br>0.47<br>(0.35/0.59) | -0.13 ± 0.14**<br>-0.11<br>(-0.21/-0.04) | -0.19 ± 0.16**<br>-0.18<br>(-0.32/-0.06) | 0.66 ± 0.12<br>0.68<br>(0.53/0.75)                                            | 0.607 ± 0.127<br>0.600<br>(0.54/0.71) | 0.58 ± 0.16<br>0.57<br>(0.45/0.70) | -0.06 ± 0.12*<br>-0.07<br>(-0.14/0.03) | -0.08 ± 0.12**<br>-0.09<br>(-0.16/-0.01) | 0.092                                   | 0.012       |
| Harassment                              | 2.8 ± 0.5<br>2.8<br>(2.2/3.2)                                               | 2.4 ± 0.5<br>2.5<br>(2.0/2.8)      | 2.2 ± 0.6<br>2.0<br>(1.8/2.5)      | -0.4 ± 0.6*<br>-0.5<br>(-0.8/0.0)        | -0.6 ± 0.7**<br>-0.5<br>(-1.1/0.0)       | 2.8 ± 0.5<br>2.8<br>(2.4/3.1)                                                 | 2.6 ± 0.6<br>2.5<br>(2.2/3.0)         | 2.5 ± 0.6<br>2.5<br>(2.0/3.1)      | -0.2 ± 0.6<br>-0.2<br>(-0.5/0.0)       | -0.3 ± 0.6*<br>-0.4<br>(-0.8/0.1)        | 0.370                                   | 0.067       |
| Overload                                | 3.1 ± 0.5<br>3.2<br>(2.8/3.5)                                               | 2.7 ± 0.6<br>2.5<br>(2.2/3.1)      | 2.6 ± 0.7<br>2.5<br>(2.1/3.0)      | -0.4 ± 0.4**<br>-0.5<br>(-0.8/0.0)       | -0.5 ± 0.5**<br>-0.5<br>(-1.0/0.0)       | 3.1 ± 0.5<br>3.1<br>(2.8/3.5)                                                 | 3.0 ± 0.5<br>3.0<br>(2.5/3.3)         | 2.9 ± 0.7<br>(2.9<br>(2.5/3.5)     | -0.1 ± 0.5<br>-0.2<br>(-0.5/0.1)       | -0.2 ± 0.5*<br>0.0<br>(-0.5/0.0)         | 0.046                                   | 0.014       |
| Irritability                            | 3.0 ± 0.6<br>3.0<br>(2.8/3.5)                                               | 2.7 ± 0.7<br>2.5<br>(2.0/3.2)      | 2.4 ± 0.6<br>2.5<br>(2.0/3.0)      | -0.3 ± 0.7*<br>-0.5<br>(-1.0/0.0)        | -0.6 ± 0.7**<br>-1.0<br>(-1.0/0.0)       | 2.8 ± 0.6<br>3.0<br>(2.5/3.5)                                                 | 2.8 ± 0.6<br>3.0<br>(2.5/3.0)         | 2.6 ± 0.6<br>2.5<br>(2.4/3.0)      | 0.0 ± 0.6<br>0.0<br>(-0.5/0.5)         | -0.2 ± 0.6*<br>0.0<br>(-0.5/0.0)         | 0.143                                   | 0.030       |
| Lack of joy                             | 3.0 ± 0.4<br>3.0<br>(2.8/3.4)                                               | 2.7 ± 0.5<br>2.9<br>(2.3/3.1)      | 2.6 ± 0.4<br>2.6<br>(2.2/2.9)      | -0.3 ± 0.5*<br>-0.3<br>(-0.8/0.1)        | -0.4 ± 0.4**<br>-0.4<br>(-0.6/-0.1)      | 3.0 ± 0.5<br>3.1<br>(2.7/3.4)                                                 | 2.9 ± 0.4<br>2.9<br>(2.7/3.3)         | 2.9 ± 0.6<br>2.8<br>(2.5/3.3)      | -0.1 ± 0.3<br>-0.2<br>(-0.3/0.1)       | -0.1 ± 0.4*<br>-0.1<br>(-0.3/0.1)        | 0.199                                   | 0.006       |
| Fatigue                                 | 3.3 ± 0.4<br>3.2<br>(3.0/3.8)                                               | 2.9 ± 0.6<br>3.0<br>(2.5/3.4)      | 2.7 ± 0.5<br>2.8<br>(2.2/3.0)      | -0.4 ± 0.7*<br>-0.2<br>(-0.8/0.0)        | -0.6 ± 0.6**<br>-0.5<br>(-0.9/-0.2)      | 3.3 ± 0.4<br>3.2<br>(3.0/3.6)                                                 | 3.0 ± 0.5<br>3.2<br>(2.8/3.5)         | 3.0 ± 0.5<br>3.0<br>(2.5/3.5)      | -0.2 ± 0.4*<br>-0.2<br>(-0.5/0.0)      | -0.3 ± 0.5*<br>-0.2<br>(-0.8/0.0)        | 0.339                                   | 0.034       |
| Worries                                 | 2.8 ± 0.6<br>2.8<br>(2.2/3.4)                                               | 2.3 ± 0.7<br>2.2<br>(1.8/2.9)      | 2.2 ± 0.6<br>2.0<br>(1.8/2.8)      | -0.5 ± 0.5**<br>-0.6<br>(-0.8/0.0)       | -0.6 ± 0.6**<br>-0.6<br>(-1.0/-0.2)      | 2.8 ± 0.4<br>2.8<br>(2.6/3.2)                                                 | 2.6 ± 0.4<br>2.6<br>(2.4/3.0)         | 2.5 ± 0.6<br>2.4<br>(2.0/3.0)      | -0.2 ± 0.4*<br>-0.2<br>(-0.4/0.0)      | -0.4 ± 0.5**<br>-0.4<br>(-0.6/-0.2)      | 0.121                                   | 0.140       |
| Tension                                 | 3.1 ± 0.4<br>3.0<br>(2.8/3.5)                                               | 2.6 ± 0.6<br>2.5<br>(2.0/3.0)      | 2.4 ± 0.7<br>2.2<br>(2.0/2.8)      | -0.5 ± 0.5**<br>-0.5<br>(-0.8/-0.2)      | -0.7 ± 0.6**<br>-0.8<br>(-1.2/-0.1)      | 3.0 ± 0.5<br>3.0<br>(2.5/3.3)                                                 | 2.8 ± 0.6<br>2.8<br>(2.2/3.1)         | 2.7 ± 0.6<br>2.6<br>(2.2/3.1)      | -0.2 ± 0.6<br>-0.2<br>(-0.6/0.2)       | -0.3 ± 0.6*<br>-0.2<br>(-0.8/0.2)        | 0.077                                   | 0.012       |

Abbreviations: PSQ, Perceived Stress Questionnaire; SD, standard deviation; Q1/Q3, first quartile/third quartile; <sup>1</sup>Intention to treat (ITT) population; *p*-Value: \*\*, *p* < 0.001; \*, *p* < 0.05 (Wilcoxon-test within groups), <sup>b</sup> Mann-Whitney U test.

**Table S2.** Values of the PNF before and after the dietary intervention

|                                   | Verum group ( <i>n</i> = 29) <sup>1</sup><br>mean ± SD<br>median<br>(Q1/Q3) |        |                                    |                       |                                         | Placebo group ( <i>n</i> = 30) <sup>1</sup><br>mean ± SD<br>median<br>(Q1/Q3) |        |                                    |                       |                                      | V vs. P<br><i>p</i> -Value <sup>b</sup> |             |
|-----------------------------------|-----------------------------------------------------------------------------|--------|------------------------------------|-----------------------|-----------------------------------------|-------------------------------------------------------------------------------|--------|------------------------------------|-----------------------|--------------------------------------|-----------------------------------------|-------------|
|                                   | Baseline                                                                    | Week 8 | Week 12                            | Difference<br>8 weeks | Difference<br>12 weeks                  | Baseline                                                                      | Week 8 | Week 12                            | Difference<br>8 weeks | Difference<br>12 weeks               | 8<br>weeks                              | 12<br>weeks |
| <b>Total<br/>PNF points</b>       | 53.7 ± 13.2<br>55.0<br>(43.5/62.0)                                          | a      | 39.3 ± 14.4<br>36.0<br>(29.0/47.5) | -                     | -14.3 ± 11.8**<br>-14.0<br>(-21.0/-6.5) | 48.3 ± 10.4<br>48.5<br>(39.8/54.2)                                            | a      | 41.3 ± 14.6<br>41.5<br>(29.5/52.8) | -                     | -7.0 ± 12.5*<br>-8.0<br>(-15.2/-0.8) | -                                       | 0.063       |
| Psycho-neuro-vegetative stability | 19.0 ± 5.2<br>19.0<br>(15.0/23.0)                                           | a      | 13.3 ± 4.7<br>12.0<br>(10.0/16.5)  | -                     | -5.7 ± 4.7**<br>-6.0<br>(-8.5/-2.0)     | 17.9 ± 4.4<br>18.0<br>(14.0/21.0)                                             | a      | 14.6 ± 5.2<br>15.0<br>(11.0/17.2)  | -                     | -3.3 ± 5.2*<br>-4.0<br>(-7.0/-0.8)   | -                                       | 0.136       |
| Neurological symptoms             | 7.2 ± 3.7<br>7.0<br>(5.0/9.0)                                               | a      | 4.6 ± 2.9<br>4.0<br>(2.5/6.5)      | -                     | -2.6 ± 2.5**<br>-2.0<br>(-4.5/-1.0)     | 6.3 ± 3.5<br>6.0<br>(4.0/8.2)                                                 | a      | 4.8 ± 3.4<br>4.0<br>(3.0/6.2)      | -                     | -1.5 ± 3.2*<br>-1.5<br>(-4.0/0.0)    | -                                       | 0.246       |
| Impulsion                         | 11.8 ± 3.7<br>12.0<br>(9.0/14.5)                                            | a      | 8.4 ± 4.5<br>8.0<br>(5.5/12.0)     | -                     | -3.4 ± 3.6**<br>-3.0<br>(-5.5/-1.0)     | 9.8 ± 3.3<br>10.0<br>(7.8/12.0)                                               | a      | 9.1 ± 4.1<br>8.0<br>(6.0/13.0)     | -                     | -0.7 ± 3.4<br>-1.5<br>(-3.2/1.2)     | -                                       | 0.010       |
| Excitability                      | 5.7 ± 2.9<br>5.0<br>(4.0/8.0)                                               | a      | 4.5 ± 2.9<br>4.0<br>(2.0/6.0)      | -                     | -1.2 ± 2.2*<br>-1.0<br>(-3.0/0.5)       | 4.9 ± 2.0<br>5.0<br>(4.0/6.2)                                                 | a      | 4.3 ± 2.4<br>4.0<br>(2.0/6.2)      | -                     | -0.6 ± 2.0<br>0.0<br>(-2.0/1.0)      | -                                       | 0.334       |
| Concentration and memory          | 9.9 ± 3.7<br>11.0<br>(6.5/12.5)                                             | a      | 8.5 ± 3.9<br>8.0<br>(6.0/9.5)      | -                     | -1.4 ± 3.0*<br>-1.0<br>(-4.0/0.5)       | 9.4 ± 2.9<br>9.0<br>(7.0/12.2)                                                | a      | 8.5 ± 3.2<br>8.5<br>(6.0/11.2)     | -                     | -0.9 ± 2.9<br>-0.5<br>(-3.2/1.0)     | -                                       | 0.507       |

Abbreviations: PNF, Psychological Neurological Questionnaire; SD, standard deviation; Q1/Q3, first quartile/third quartile; <sup>1</sup>Intention to treat (ITT) population; <sup>a</sup> not implemented according to the study protocol; *p*-Value: \*\*, *p* < 0.001; \*, *p* < 0.05 (Wilcoxon- test within groups), <sup>b</sup> Mann-Whitney U test.

**Table S3.** Values of the VAS before and during the dietary intervention

|                             | Verum group ( <i>n</i> = 29) <sup>1</sup><br>mean ± SD<br>median<br>(Q1/Q3) |                                   |                                  |                                  |                                     | Placebo group ( <i>n</i> = 30) <sup>1</sup><br>mean ± SD<br>median<br>(Q1/Q3) |                                   |                                   |                                  |                                  | V vs. P<br><i>p</i> -Value <sup>b</sup> |             |
|-----------------------------|-----------------------------------------------------------------------------|-----------------------------------|----------------------------------|----------------------------------|-------------------------------------|-------------------------------------------------------------------------------|-----------------------------------|-----------------------------------|----------------------------------|----------------------------------|-----------------------------------------|-------------|
|                             | Baseline                                                                    | Week 8                            | Week 12                          | Difference<br>8 weeks            | Difference<br>12 weeks              | Baseline                                                                      | Week 8                            | Week 12                           | Difference<br>8 weeks            | Difference<br>12 weeks           | 8<br>weeks                              | 12<br>weeks |
| <b>Total VAS<br/>points</b> | 15.9 ± 3.6<br>16.0<br>(14.0/18.0)                                           | 14.1 ± 3.7<br>14.0<br>(12.0/16.0) | 12.7 ± 4.4<br>14.0<br>(8.5/16.0) | -1.8 ± 3.9<br>-2.0<br>(-4.5/0.5) | -3.3 ± 4.2**<br>-2.0<br>(-6.0/-1.0) | 15.3 ± 3.6<br>15.5<br>(12.8/17.2)                                             | 15.0 ± 3.8<br>15.0<br>(12.8/17.2) | 14.5 ± 4.3<br>15.0<br>(10.0/17.5) | -0.3 ± 4.6<br>-1.0<br>(-4.0/3.2) | -0.8 ± 5.5<br>-2.0<br>(-5.0/3.0) | 0.284                                   | 0.178       |
| Lack of<br>motivation       | 3.1 ± 1.0<br>3.0<br>(2.5/4.0)                                               | 2.7 ± 0.8<br>3.0<br>(2.0/3.0)     | 2.4 ± 1.1<br>2.0<br>(1.5/3.0)    | -0.4 ± 1.1<br>-1.0<br>(-1.0/0.5) | -0.7 ± 1.1*<br>-1.0<br>(-1.0/0.0)   | 3.2 ± 0.9<br>3.0<br>(3.0/4.0)                                                 | 2.9 ± 1.0<br>3.0<br>(2.0/4.0)     | 2.9 ± 1.0<br>3.0<br>(2.0/4.0)     | -0.3 ± 1.2<br>0.0<br>(-1.0/0.2)  | -0.4 ± 1.3<br>-1.0<br>(-1.0/0.2) | 0.671                                   | 0.558       |
| Indifference                | 3.0 ± 1.0<br>3.0<br>(2.5/4.0)                                               | 2.4 ± 1.1<br>2.0<br>(2.0/3.5)     | 2.2 ± 1.0<br>2.0<br>(1.0/3.0)    | -0.5 ± 1.3*<br>0.0<br>(-1.0/0.0) | -0.8 ± 1.1*<br>0.0<br>(-2.0/0.0)    | 2.8 ± 1.0<br>3.0<br>(2.0/4.0)                                                 | 2.8 ± 1.0<br>3.0<br>(2.0/3.0)     | 2.5 ± 1.1<br>2.0<br>(2.0/3.0)     | -0.0 ± 1.2<br>0.0<br>(-1.0/1.0)  | -0.3 ± 1.5<br>-0.5<br>(-2.0/1.0) | 0.155                                   | 0.235       |
| Fatigue                     | 3.4 ± 1.1<br>3.0<br>(3.0/4.0)                                               | 3.1 ± 1.1<br>3.0<br>(3.0/4.0)     | 2.8 ± 1.2<br>3.0<br>(2.0/4.0)    | -0.3 ± 1.3<br>0.0<br>(-1.0/1.0)  | -0.6 ± 1.3*<br>0.0<br>(-1.5/0.0)    | 3.5 ± 1.0<br>4.0<br>(3.0/4.0)                                                 | 3.4 ± 1.1<br>3.0<br>(3.0/4.0)     | 3.5 ± 1.0<br>3.0<br>(3.0/4.2)     | -0.1 ± 1.4<br>0.0<br>(-1.0/1.0)  | 0.0 ± 1.3<br>0.0<br>(-1.0/1.0)   | 0.728                                   | 0.096       |
| Mood<br>changes             | 3.2 ± 0.9<br>3.0<br>(3.0/4.0)                                               | 2.9 ± 1.0<br>3.0<br>(2.0/3.5)     | 2.7 ± 1.0<br>3.0<br>(2.0/3.0)    | -0.3 ± 1.1<br>0.0<br>(-1.0/0.0)  | -0.5 ± 1.1*<br>0.0<br>(-1.0/0.0)    | 2.8 ± 1.0<br>3.0<br>(2.0/4.0)                                                 | 2.9 ± 1.1<br>3.0<br>(2.0/4.0)     | 2.6 ± 1.1<br>2.0<br>(2.0/3.0)     | 0.1 ± 1.2<br>0.0<br>(-1.0/1.0)   | -0.2 ± 1.5<br>0.0<br>(-1.0/1.0)  | 0.250                                   | 0.389       |
| Productivity                | 3.1 ± 1.1<br>3.0<br>(2.0/4.0)                                               | 2.9 ± 0.8<br>3.0<br>(2.0/3.0)     | 2.5 ± 1.0<br>2.0<br>(2.0/3.0)    | -0.2 ± 0.9<br>0.0<br>(-1.0/0.0)  | -0.6 ± 1.1*<br>-1.0<br>(-1.0/0.0)   | 2.9 ± 0.9<br>3.0<br>(2.8/3.2)                                                 | 3.0 ± 1.0<br>3.0<br>(2.0/4.0)     | 3.0 ± 0.9<br>3.0<br>(2.0/4.0)     | 0.1 ± 1.2<br>0.0<br>(-1.0/1.0)   | 0.0 ± 1.2<br>0.0<br>(-1.0/1.0)   | 0.364                                   | 0.040       |

Abbreviations: VAS, visual analogue scales; SD, standard deviation; Q1/Q3, first quartile/third quartile; <sup>1</sup>Intention to treat (ITT) population; *p*-Value: \*\*, *p* < 0.001; \*, *p* < 0.05 (Wilcoxon- test within groups), <sup>b</sup> Mann-Whitney U test.

**Table S4.** Changes in salivary cortisol, serotonin, mineral, and vitamin concentrations during the dietary intervention

|                                 | Verum group ( <i>n</i> = 29) <sup>1</sup> |                                        |                                        | Placebo group ( <i>n</i> = 30) <sup>1</sup> |                                       |                                         | V vs. P<br><i>p</i> -Value <sup>a</sup> |
|---------------------------------|-------------------------------------------|----------------------------------------|----------------------------------------|---------------------------------------------|---------------------------------------|-----------------------------------------|-----------------------------------------|
|                                 | Mean ± SD<br>Median<br>(Q1/Q3)            |                                        |                                        | Mean ± SD<br>Median<br>(Q1/Q3)              |                                       |                                         |                                         |
|                                 | Baseline                                  | Week 12                                | Difference                             | Baseline                                    | Week 12                               | Difference                              | 12 weeks                                |
| <b>Salivary</b>                 |                                           |                                        |                                        |                                             |                                       |                                         |                                         |
| Cortisol_morning<br>(ng/ml)     | 12.54 ± 6.61<br>12.2<br>(3.2/25.4)        | 13.96 ± 5.76<br>13.3<br>(5.3/26.7)     | 1.42 ± 8.17<br>1.4<br>(-14.9/15.4)     | 14.62 ± 4.55<br>14.6<br>(5.0/21.5)          | 15.08 ± 6.64<br>14.35<br>(4.2/27.2)   | 0.47 ± 5.78<br>0.95<br>(-9.1/11.8)      | 0.596                                   |
| Cortisol_evening<br>(ng/ml)     | 3.00 ± 4.90<br>1.50<br>(1.20/2.50)        | 2.07 ± 1.80<br>1.70<br>(1.20/2.45)     | -0.93 ± 5.03<br>-0.10<br>(-0.70/0.40)  | 2.04 ± 2.49<br>1.25<br>(0.90/2.05)          | 2.59 ± 3.60<br>1.50<br>(0.88/2.52)    | 0.55 ± 4.10<br>-0.05<br>(-0.52/0.72)    | 0.495                                   |
| Δ cortisol (m – e)<br>(ng/ml)   | 9.54 ± 6.37<br>9.70<br>(2.95/12.85)       | 11.89 ± 6.05<br>11.20<br>(6.50/17.30)  | 2.34 ± 7.32<br>1.10<br>(-2.25/8.80)    | 12.57 ± 5.35<br>13.00<br>(9.00/16.78)       | 12.49 ± 7.98<br>12.25<br>(8.02/18.40) | -0.08 ± 7.60<br>0.50<br>(-5.78/5.58)    | 0.300                                   |
| <b>Serum</b>                    |                                           |                                        |                                        |                                             |                                       |                                         |                                         |
| Serotonin (μg/L)                | 137.7 ± 58.0<br>126.0<br>(92.0/182.5)     | 138.7 ± 57.3<br>129.0<br>(87.0/186.5)  | 1.0 ± 20.9<br>2.0<br>(-6.5/12.0)       | 150.1 ± 80.9<br>136.5<br>(107.0/165.5)      | 140.5 ± 99.8<br>121.0<br>(84.8/143.5) | -9.6 ± 32.4*<br>-8.5<br>(-25.5/3.8)     | 0.047                                   |
| Folic acid (ng/mL) <sup>b</sup> | 9.67 ± 4.13<br>8.60<br>(6.55/12.40)       | 18.18 ± 2.84<br>20.00<br>(16.45/20.00) | 8.51 ± 4.38**<br>10.00<br>(5.75/11.50) | 9.48 ± 3.08<br>8.20<br>(7.65/10.85)         | 8.93 ± 3.71<br>7.80<br>(6.28/11.05)   | -0.55 ± 2.48<br>-0.70<br>(-1.75/0.75)   | < 0.001                                 |
| Magnesium (mmol/L)              | 0.87 ± 0.06<br>0.87<br>(0.84/0.90)        | 0.87 ± 0.05<br>0.85<br>(0.82/0.90)     | -0.00 ± 0.04<br>-0.01<br>(-0.03/0.03)  | 0.89 ± 0.06<br>0.90<br>(0.85/0.94)          | 0.86 ± 0.06<br>0.86<br>(0.83/0.90)    | -0.03 ± 0.05*<br>-0.04<br>(-0.06/0.01)  | 0.021                                   |
| Calcium (mmol/L)                | 2.38 ± 0.08<br>2.38<br>(2.33/2.43)        | 2.37 ± 0.09<br>2.37<br>(2.31/2.42)     | -0.01 ± 0.10<br>-0.02<br>(-0.09/0.07)  | 2.40 ± 0.12<br>2.39<br>(2.30/2.51)          | 2.37 ± 0.10<br>2.36<br>(2.29/2.44)    | -0.03 ± 0.10*<br>(-0.04<br>(-0.10/0.02) | 0.413                                   |

Abbreviations: Δ cortisol; cortisol difference morning-evening; SD, standard deviation; Q1/Q3, first quartile/third quartile; <sup>1</sup>Intention to treat (ITT) population; *p*-Value: \*\*, *p* < 0.001; \*, *p* < 0.05 (Wilcoxon test); <sup>a</sup> Mann-Whitney U test; <sup>b</sup> data not available for one participant in the placebo group at baseline (hemolytic blood sample).

**Table S5.** Changes in serum amino acid concentrations during the dietary intervention

|                          | Verum group ( <i>n</i> = 29) <sup>1</sup> |                                         |                                           | Placebo group ( <i>n</i> = 30) <sup>1</sup> |                                         |                                          | V vs. P<br><i>p</i> -Value <sup>a</sup> |
|--------------------------|-------------------------------------------|-----------------------------------------|-------------------------------------------|---------------------------------------------|-----------------------------------------|------------------------------------------|-----------------------------------------|
|                          | Mean ± SD<br>Median<br>(Q1/Q3)            |                                         |                                           | Mean ± SD<br>Median<br>(Q1/Q3)              |                                         |                                          |                                         |
|                          | Baseline                                  | Week 12                                 | Difference                                | Baseline                                    | Week 12                                 | Difference                               | 12 weeks                                |
| Protein (g/dL) †         | 7.15 ± 0.34<br>7.07<br>(6.6/8.0)          | 7.16 ± 0.40<br>7.08<br>(6.3/8.2)        | 0.01 ± 0.36<br>0.0<br>(-0.8/0.8)          | 7.41 ± 0.43<br>7.44<br>(6.6/8.6)            | 7.24 ± 0.44<br>7.14<br>(6.4/8.3)        | -0.17 ± 0.38*<br>-0.13<br>(-1.0/0.8)     | 0.075                                   |
| L-arginine (μmol/L) †    | 115.9 ± 27.9<br>113.0<br>(97.5/120.5)     | 122.7 ± 25.4<br>119.0<br>(109.0/133.0)  | 6.8 ± 19.4<br>8.0<br>(-6.0/18.5)          | 132.7 ± 22.8<br>133.5<br>(119.2/145.0)      | 126.3 ± 19.5<br>123.0<br>(113.5/142.2)  | -6.4 ± 23.1<br>-8.5<br>(-19.5/11.5)      | 0.014                                   |
| L-ornithine (μmol/L)     | 106.7 ± 33.0<br>99.0<br>(85.5/118.0)      | 108.4 ± 67.4<br>103.0<br>(76.0/117.0)   | 1.8 ± 52.0<br>-10.0<br>(-18.0/11.0)       | 100.3 ± 21.3<br>98.5<br>(84.0/116.0)        | 100.4 ± 32.5<br>97.5<br>(79.8/117.8)    | 0.1 ± 22.5<br>-4.0<br>(-18.0/20.2)       | 0.590                                   |
| L-phenylalanine (μmol/L) | 95.6 ± 19.8<br>96.0<br>(83.5/112.0)       | 97.5 ± 14.5<br>96.0<br>(88.0/109.0)     | 1.9 ± 17.9<br>0.0<br>(-4.5/6.0)           | 99.6 ± 13.2<br>97.0<br>(89.5/109.0)         | 94.9 ± 15.9<br>95.0<br>(83.8/110.0)     | -4.6 ± 15.7<br>-4.5<br>(-16.2/4.2)       | 0.090                                   |
| Taurine (μmol/L)         | 157.0 ± 35.5<br>158.0<br>(126.0/187.5)    | 175.3 ± 49.5<br>173.0<br>(144.0/198.5)  | 18.3 ± 38.2*<br>20.0<br>(-9.0/44.0)       | 154.6 ± 27.4<br>155.5<br>(133.0/168.8)      | 151.4 ± 43.6<br>146.0<br>(123.8/169.5)  | -3.2 ± 40.1<br>1.0<br>(-31.0/23.5)       | 0.027                                   |
| L-Trp (μmol/L)           | 53.0 ± 14.8<br>50.0<br>(43.5/58.5)        | 53.1 ± 9.3<br>50.0<br>(46.0/60.2)       | 0.1 ± 14.9<br>3.0<br>(-3.0/5.0)           | 54.9 ± 9.4<br>54.5<br>(48.0/60.2)           | 54.6 ± 9.8<br>54.0<br>(46.8/58.5)       | -0.3 ± 7.8<br>-1.5<br>(-5.2/4.2)         | 0.197                                   |
| L-tyrosine (μmol/L)      | 67.5 ± 17.4<br>67.0<br>(57.0/78.0)        | 71.4 ± 21.9<br>67.0<br>(62.0/76.0)      | 3.9 ± 18.6<br>3.0<br>(-9.0/10.0)          | 70.4 ± 13.1<br>72.0<br>(65.8/76.8)          | 69.2 ± 14.7<br>66.5<br>(61.0/76.8)      | -1.2 ± 19.3<br>-4.5<br>(-9.5/2.5)        | 0.102                                   |
| L-Trp/CAA                | 0.087 ± 0.033<br>0.082<br>(0.074/0.090)   | 0.088 ± 0.015<br>0.086<br>(0.078/0.096) | 0.001 ± 0.033*<br>0.006<br>(0.000/0.014)  | 0.086 ± 0.013<br>0.082<br>(0.075/0.096)     | 0.087 ± 0.015<br>0.086<br>(0.076/0.093) | 0.001 ± 0.014<br>0.002<br>(-0.008/0.011) | 0.181                                   |
| L-Trp/BCAA               | 0.117 ± 0.040<br>0.115<br>(0.104/0.119)   | 0.122 ± 0.021<br>0.117<br>(0.110/0.132) | 0.005 ± 0.039*<br>0.011<br>(-0.003/0.025) | 0.118 ± 0.021<br>0.112<br>(0.100/0.134)     | 0.118 ± 0.022<br>0.114<br>(0.099/0.130) | 0.000 ± 0.021<br>0.001<br>(-0.014/0.014) | 0.088                                   |

Abbreviations: BCAA, branched-chain amino acids (the sum of L-valine, L-leucine, and L-isoleucine); CAA, competing amino acids (the sum of the BCAA, L-phenylalanine, and L-tyrosine); L-Trp; L-tryptophan; SD, standard deviation; Q1/Q3, first quartile/third quartile; <sup>1</sup>Intention to treat (ITT) population; *p*-Value: \*\*, *p* < 0.001; \*, *p* < 0.05 (Wilcoxon test); †, significant group difference at baseline; <sup>a</sup> Mann-Whitney U test.

**Table S6.** Changes in urinary concentrations during the dietary intervention

|                       | Verum group ( <i>n</i> = 29) <sup>1</sup> |                                        |                                        | Placebo group ( <i>n</i> = 30) <sup>1</sup> |                                        |                                       | V vs. P<br><i>p</i> -Value <sup>a</sup> |
|-----------------------|-------------------------------------------|----------------------------------------|----------------------------------------|---------------------------------------------|----------------------------------------|---------------------------------------|-----------------------------------------|
|                       | Mean ± SD<br>Median<br>(Q1/Q3)            |                                        |                                        | Mean ± SD<br>Median<br>(Q1/Q3)              |                                        |                                       |                                         |
|                       | Baseline                                  | Week 12                                | Difference                             | Baseline                                    | Week 12                                | Difference                            | 12 weeks                                |
| Magnesium (mmol/24 h) | 3.38 ± 1.41<br>3.22<br>(2.95/4.88)        | 5.67 ± 1.49<br>5.49<br>(4.64/7.10)     | 1.84 ± 1.56**<br>1.59<br>(-1.08/2.97)  | 3.63 ± 1.27<br>3.52<br>(2.56/4.46)          | 3.84 ± 1.61<br>3.48<br>(2.80/4.77)     | 0.21 ± 1.22<br>0.44<br>(-0.30/0.78)   | < 0.001                                 |
| Calcium (mmol/24 h)   | 4.88 ± 2.36<br>4.18<br>(3.33/6.08)        | 5.60 ± 3.19<br>5.10<br>(3.20/6.88)     | 0.71 ± 2.58*<br>0.70<br>(-0.30/1.80)   | 4.58 ± 3.26<br>3.39<br>(2.62/5.97)          | 4.32 ± 2.93<br>3.40<br>(2.47/5.30)     | -0.26 ± 1.56<br>-0.32<br>(-1.81/0.89) | 0.023                                   |
| Sodium (mmol/24 h)    | 166.9 ± 66.3<br>141 .0<br>(105.5/218.0)   | 142.0 ± 58.1<br>137.0<br>(102.9/172.5) | -24.9 ± 65.9*<br>-20.0<br>(-80.0/29.5) | 157.4 ± 75.7<br>142.0<br>(109.4/185.0)      | 172.0 ± 84.5<br>147.0<br>(122.8/217.0) | 14.7 ± 82.9<br>9.5<br>(-42.6/74.7)    | 0.025                                   |
| Chloride (mmol/24 h)  | 151.9 ± 60.8<br>135.0<br>(108.0/202.0)    | 140.6 ± 56.1<br>138.0<br>(109.5/176.0) | -11.3 ± 59.1<br>-1.0<br>(-60.0/24.5)   | 134.3 ± 66.4<br>126.5<br>(92.8/162.2)       | 148.5 ± 76.6<br>124.5<br>(107.8/163.8) | 14.2 ± 70.3<br>19.5<br>(-31.0/67.0)   | 0.145                                   |
| pH value              | 6.22 ± 0.42<br>6.19<br>(5.90/6.59)        | 6.06 ± 0.43<br>6.03<br>(5.76/6.39)     | -0.16 ± 0.48<br>-0.11<br>(-0.51/0.15)  | 6.16 ± 0.35<br>6.16<br>(5.92/6.38)          | 6.26 ± 0.42<br>6.24<br>(5.90/6.60)     | 0.10 ± 0.44<br>0.20<br>(-0.23/0.44)   | 0.028                                   |
| Creatinine (g/24h)    | 1.46 ± 0.53<br>1.34<br>(1.11/1.68)        | 1.37 ± 0.44<br>1.22<br>(1.11/1.62)     | -0.09 ± 0.34<br>-0.04<br>(-0.20/0.08)  | 1.37 ± 0.52<br>1.21<br>(1.00/1.61)          | 1.37 ± 0.53<br>1.18<br>(0.96/1.54)     | -0.04 ± 0.30<br>-0.06<br>(-0.23/0.09) | 0.949                                   |
| Volume (L/24h)        | 2.14 ± 0.69<br>2.00<br>(1.67/2.59)        | 2.12 ± 0.73<br>2.00<br>(1.64/2.68)     | -0.02 ± 0.80<br>-0.05<br>(-0.60/0.40)  | 2.13 ± 0.96<br>2.15<br>(1.30/2.92)          | 2.10 ± 0.85<br>2.20<br>(1.49/2.52)     | -0.03 ± 0.69<br>-0.10<br>(-0.48/0.46) | 0.871                                   |

Abbreviations: SD, standard deviation; Q1/Q3, first quartile/third quartile; <sup>1</sup>Intention to treat (ITT) population; *p*-Value: \*\*, *p* < 0.001; \*, *p* < 0.05 (Wilcoxon test); <sup>a</sup> Mann-Whitney U test.

**Table S7.** Changes in anthropometric and clinical parameters during the dietary intervention

|                                                                  | Verum group ( <i>n</i> = 29) <sup>1</sup> |                                         |                                          | Placebo group ( <i>n</i> = 30) <sup>1</sup> |                                         |                                          | V vs. P<br><i>p</i> -Value <sup>a</sup> |
|------------------------------------------------------------------|-------------------------------------------|-----------------------------------------|------------------------------------------|---------------------------------------------|-----------------------------------------|------------------------------------------|-----------------------------------------|
|                                                                  | Mean ± SD<br>Median<br>(Q1/Q3)            |                                         |                                          | Mean ± SD<br>Median<br>(Q1/Q3)              |                                         |                                          |                                         |
|                                                                  | Baseline                                  | Week 12                                 | Difference                               | Baseline                                    | Week 12                                 | Difference                               | 12 weeks                                |
| Weight<br>(kg)                                                   | 73.3 ± 13.3<br>74.6<br>(60.8/83.9)        | 73.5 ± 13.3<br>74.5<br>(61.6/83.4)      | 0.2 ± 1.2<br>0.2<br>(-0.4/1.0)           | 76.2 ± 21.4<br>69.6<br>(60.6/93.2)          | 77.1 ± 22.4<br>69.0<br>(60.8/93.5)      | 0.9 ± 2.0*<br>0.8<br>(-0.2/1.8)          | 0.292                                   |
| Body mass index<br>(BMI, kg/m <sup>2</sup> )                     | 25.2 ± 4.4<br>24.9<br>(22.1/27.0)         | 25.3 ± 4.3<br>25.0<br>(22.2/27.4)       | 0.1 ± 0.4<br>0.1<br>(-0.2/0.3)           | 25.9 ± 5.8<br>24.3<br>(21.7/29.2)           | 26.2 ± 6.1<br>24.1<br>(21.8/30.4)       | 0.3 ± 0.6*<br>0.3<br>(-0.1/0.7)          | 0.253                                   |
| Waist circumference<br>(cm)                                      | 90.2 ± 12.5<br>90.0<br>(81.5/99.0)        | 90.3 ± 12.4<br>91.0<br>(80.5/99.0)      | 0.1 ± 1.3<br>0.0<br>(-1.0/1.0)           | 92.1 ± 16.5<br>88.5<br>(79.8/104.8)         | 92.8 ± 16.6<br>89.0<br>(80.0/106.0)     | 0.7 ± 1.8*<br>0.5<br>(0.0/1.0)           | 0.133                                   |
| Waist-to-height ratio<br>(WHtR)                                  | 0.530 ± 0.077<br>0.543<br>(0.469/0.560)   | 0.531 ± 0.076<br>0.543<br>(0.469/0.563) | 0.001 ± 0.007<br>0.000<br>(-0.006/0.006) | 0.540 ± 0.085<br>0.536<br>(0.481/0.580)     | 0.543 ± 0.085<br>0.536<br>(0.486/0.583) | 0.004 ± 0.011*<br>0.003<br>(0.000/0.006) | 0.120                                   |
| Systolic blood pressure<br>(mmHg)                                | 113.7 ± 12.6<br>111.0<br>(103.7/123.2)    | 111.0 ± 11.3<br>109.3<br>(104.2/119.8)  | -2.7 ± 7.2*<br>-2.3<br>(-6.5/0.0)        | 111.2 ± 15.8<br>107.5<br>(100.8/120.5)      | 108.6 ± 14.9<br>106.5<br>(98.1/120.9)   | -2.5 ± 7.3*<br>-3.2<br>(-7.8/2.4)        | 0.871                                   |
| Diastolic blood pressure<br>(mmHg)                               | 75.1 ± 8.2<br>74.7<br>(69.2/81.8)         | 73.8 ± 6.9<br>74.0<br>(70.3/77.8)       | -1.3 ± 5.1<br>-1.3<br>(-4.5/2.3)         | 75.7 ± 9.0<br>77.7<br>(69.5/80.7)           | 74.5 ± 8.5<br>73.5<br>(67.1/82.3)       | -1.2 ± 4.7<br>-0.8<br>(-5.1/1.8)         | 0.973                                   |
| Resting heart rate<br>(1/min)                                    | 66.7 ± 9.0<br>65.7<br>(60.5/72.5)         | 65.3 ± 7.4<br>65.3<br>(60.2/70.7)       | -1.4 ± 6.8<br>-1.3<br>(-6.0/1.8)         | 66.5 ± 8.4<br>67.0<br>(61.2/72.0)           | 67.4 ± 10.0<br>67.3<br>(58.9/72.2)      | 1.0 ± 9.0<br>-1.2<br>(-4.4/7.4)          | 0.495                                   |
| Resting heart rate<br>(female; V: <i>n</i> =21, P: <i>n</i> =20) | 67.8 ± 9.1<br>66.0<br>(61.3/73.3)         | 67.3 ± 6.9<br>66.0<br>(63.0/72.7)       | -0.5 ± 7.2<br>0.3<br>(-3.7/2.0)          | 66.2 ± 8.4<br>66.8<br>(61.2/71.8)           | 65.2 ± 8.6<br>67.0<br>(57.9/71.7)       | -1.0 ± 8.4<br>-2.3<br>(-6.2/8.2)         | 0.412                                   |
| Resting heart rate<br>(male; V: <i>n</i> =8, P: <i>n</i> =10)    | 64.0 ± 8.8<br>62.2<br>(57.7/66.8)         | 60.2 ± 6.5<br>60.0<br>(56.0/64.5)       | -3.8 ± 5.0<br>-4.7<br>(-6.6/1.3)         | 67.0 ± 8.9<br>67.0<br>(60.1/73.2)           | 71.9 ± 11.6<br>69.2<br>(64.6/77.2)      | 4.9 ± 9.3<br>2.8<br>(-1.0/7.4)           | 0.011                                   |
| Pulse pressure<br>(mmHg)                                         | 38.6 ± 7.2<br>39.0<br>(35.3/42.2)         | 37.2 ± 6.1<br>36.3<br>(33.2/40.2)       | -1.4 ± 5.1<br>-1.0<br>(-4.3/2.8)         | 35.5 ± 9.2<br>33.8<br>(28.6/40.3)           | 34.2 ± 8.7<br>(34.8<br>(26.5/41.1)      | -1.3 ± 5.8<br>-1.0<br>(-5.3/2.0)         | 0.919                                   |

Abbreviations: SD, standard deviation; Q1/Q3, first quartile/third quartile; <sup>1</sup>Intention to treat (ITT) population; *p*-Value: \*\*, *p* < 0.001; \*, *p* < 0.05 (Wilcoxon test); <sup>a</sup> Mann-Whitney U test.

**Table S8.** Changes in cardiometabolic parameters during the dietary intervention

|                                                                | Verum group ( <i>n</i> = 29) <sup>1</sup> |                                        |                                      | Placebo group ( <i>n</i> = 30) <sup>1</sup> |                                        |                                       | V vs. P<br><i>p</i> -Value <sup>a</sup> |
|----------------------------------------------------------------|-------------------------------------------|----------------------------------------|--------------------------------------|---------------------------------------------|----------------------------------------|---------------------------------------|-----------------------------------------|
|                                                                | Mean ± SD<br>Median<br>(Q1/Q3)            |                                        |                                      | Mean ± SD<br>Median<br>(Q1/Q3)              |                                        |                                       |                                         |
|                                                                | Baseline                                  | Week 12                                | Difference                           | Baseline                                    | Week 12                                | Difference                            | 12 weeks                                |
| Total cholesterol<br>(TC, mg/dl)                               | 209.9 ± 51.7<br>204.0<br>(180.0/228.5)    | 206.4 ± 47.3<br>197.0<br>(174.5/228.5) | -3.4 ± 20.6<br>-5.0<br>(-15.5/13.0)  | 213.1 ± 43.2<br>211.5<br>(178.8/247.2)      | 210.9 ± 45.7<br>203.5<br>(189.2/238.5) | -2.2 ± 25.7<br>-2.0<br>(-21.2/19.0)   | 0.931                                   |
| HDL-C<br>(mg/dl)                                               | 64.3 ± 18.6<br>64.5<br>(48.5/81.0)        | 65.8 ± 19.0<br>64.0<br>(52.0/80.5)     | 1.6 ± 7.2<br>1.3<br>(-5.0/5.6)       | 64.4 ± 21.7<br>61.4<br>(46.6/75.0)          | 63.8 ± 23.4<br>60.4<br>(48.8/67.9)     | -0.6 ± 8.0<br>0.0<br>(-8.6/3.8)       | 0.203                                   |
| LDL-C<br>(mg/dl)                                               | 130.1 ± 48.0<br>127.0<br>(94.0/156.0)     | 125.9 ± 43.4<br>114.0<br>(97.5/156.5)  | -4.2 ± 18.6<br>-8.0<br>(-18.0/8.0)   | 137.2 ± 35.1<br>137.0<br>(108.8/164.8)      | 132.6 ± 35.8<br>126.5<br>(110.5/159.0) | -4.6 ± 21.8<br>-8.5<br>(-17.5/9.0)    | 0.961                                   |
| Triglycerides<br>(TG, mg/dl)                                   | 109.2 ± 64.9<br>87.0<br>(71.0/127.5)      | 109.7 ± 63.7<br>97.0<br>(71.0/117.0)   | 0.5 ± 35.5<br>5.0<br>(-11.5/23.0)    | 92.7 ± 41.8<br>84.0<br>(71.2/105.8)         | 110.7 ± 92.2<br>81.0<br>(67.8/114.5)   | 18.0 ± 75.6<br>9.0<br>(-11.8/18.8)    | 0.606                                   |
| Fasting plasma glucose<br>(FPG, mg/dl)                         | 88.1 ± 9.3<br>85.0<br>(79.0/96.0)         | 86.2 ± 7.2<br>88.0<br>(79.0/90.5)      | -1.8 ± 6.2<br>0.0<br>(-6.5/2.0)      | 91.4 ± 22.6<br>86.5<br>(79.5/95.0)          | 94.5 ± 35.0<br>86.5<br>(78.8/95.5)     | 3.1 ± 15.5<br>0.0<br>(-4.0/5.8)       | 0.295                                   |
| HbA1 <sub>c</sub><br>(glycated hemoglobin A1 <sub>c</sub> , %) | 5.41 ± 0.29<br>5.40<br>(5.25/5.55)        | 5.41 ± 0.24<br>5.40<br>(5.20/5.60)     | 0.00 ± 0.30<br>0.00<br>(-0.20/0.20)  | 5.63 ± 0.75<br>5.45<br>(5.30/5.70)          | 5.62 ± 0.94<br>5.35<br>(5.18/5.72)     | -0.01 ± 0.29<br>0.00<br>(-0.20/0.20)  | 0.841                                   |
| HOMA-Index                                                     | 1.50 ± 0.84<br>1.30<br>(0.85/2.05)        | 1.50 ± 1.05<br>1.20<br>(0.90/1.60)     | 0.01 ± 0.91<br>-0.10<br>(-0.45/0.40) | 1.96 ± 2.04<br>1.35<br>(1.05/2.10)          | 2.83 ± 4.89<br>1.20<br>(0.95/1.90)     | 0.87 ± 3.47<br>-0.10<br>(-0.52/0.55)  | 0.859                                   |
| Insulin-ECLIA(μU/mL)                                           | 6.75 ± 3.54<br>6.03<br>(3.97/8.42)        | 7.02 ± 4.71<br>5.36<br>(4.19/7.21)     | 0.27 ± 4.06<br>-0.47<br>(-1.92/1.96) | 7.83 ± 4.90<br>6.43<br>(4.86/8.70)          | 10.00 ± 13.71<br>5.51<br>(4.72/9.42)   | 2.17 ± 11.49<br>-0.36<br>(-2.26/2.56) | 0.839                                   |

Abbreviations: ECLIA, electrochemiluminescence immunoassay; HDL-C, high-density lipoprotein cholesterol; HOMA-index, homeostasis model assessment index; LDL-C, low-density lipoprotein cholesterol; SD, standard deviation; Q1/Q3, first quartile/third quartile; <sup>1</sup>Intention to treat (ITT) population; *p*-Value: \*\*, *p* < 0.001; \*, *p* < 0.05 (Wilcoxon test); <sup>a</sup> Mann-Whitney U test.



**Table S9.** Changes in further serum parameters during the dietary intervention

|                                             | Verum group ( <i>n</i> = 29) <sup>1</sup> |                                     |                                         | Placebo group ( <i>n</i> = 30) <sup>1</sup> |                                       |                                      | V vs. P<br><i>p</i> -Value <sup>a</sup> |
|---------------------------------------------|-------------------------------------------|-------------------------------------|-----------------------------------------|---------------------------------------------|---------------------------------------|--------------------------------------|-----------------------------------------|
|                                             | Mean ± SD<br>Median<br>(Q1/Q3)            |                                     |                                         | Mean ± SD<br>Median<br>(Q1/Q3)              |                                       |                                      |                                         |
|                                             | Baseline                                  | Week 12                             | Difference                              | Baseline                                    | Week 12                               | Difference                           | 12 weeks                                |
| C-reactive protein sensitive<br>(CRP, mg/L) | 2.86 ± 3.89<br>1.40<br>(0.60/2.45)        | 2.23 ± 3.23<br>1.10<br>(0.50/2.35)  | -0.62 ± 3.46<br>0.00<br>(-0.75/0.35)    | 1.65 ± 2.97<br>0.60<br>(0.50/1.60)          | 1.85 ± 2.46<br>0.90<br>(0.40/2.55)    | 0.21 ± 3.48<br>0.00<br>(-0.20/0.40)  | 0.312                                   |
| Ferritin<br>(ng/mL)                         | 99.2 ± 68.5<br>78.0<br>(44.0/152.0)       | 80.9 ± 81.2<br>61.0<br>(33.0/126.0) | -18.3 ± 23.4**<br>-12.0<br>(-33.0/-2.0) | 129.1 ± 135.5<br>96.0<br>(40.2/181.8)       | 145.8 ± 182.0<br>71.0<br>(35.8/180.2) | 16.7 ± 107.0<br>-2.5<br>(-13.5/15.0) | 0.011                                   |
| Gamma-glutamyltransferase<br>(GGT, U/L)     | 21.7 ± 14.8<br>15.0<br>(11.0/27.5)        | 23.7 ± 20.2<br>16.0<br>(12.0/27.0)  | 1.9 ± 13.0<br>1.0<br>(-1.5/3.0)         | 22.8 ± 12.2<br>20.0<br>(12.0/32.0)          | 24.4 ± 20.9<br>16.0<br>(11.8/31.2)    | 1.6 ± 18.1<br>-1.0<br>(-4.0/2.0)     | 0.088                                   |
| Aspartate aminotransferase<br>(ASAT, U/L)   | 27.0 ± 17.6<br>24.0<br>(20.0/28.0)        | 26.3 ± 5.9<br>27.0<br>(22.5/29.5)   | -0.8 ± 14.7<br>1.0<br>(-1.0/4.0)        | 23.5 ± 4.7<br>23.5<br>(21.0/27.0)           | 35.5 ± 66.0<br>22.0<br>(19.0/28.0)    | 12.0 ± 66.3<br>0.0<br>(-3.0/2.0)     | 0.126                                   |
| Alanine aminotransferase<br>(ALAT, U/L)     | 23.9 ± 12.4<br>22.0<br>(16.5/27.0)        | 27.3 ± 15.4<br>22.0<br>(19.0/31.5)  | 3.4 ± 8.1*<br>3.0<br>(-1.0/8.0)         | 23.3 ± 12.1<br>20.5<br>(13.8/29.2)          | 52.7 ± 162.5<br>18.5<br>(14.8/29.8)   | 29.4 ± 163.4<br>-0.5<br>(-4.0/3.2)   | 0.047                                   |
| GFR (CKD-EPI)<br>(mL/min)                   | 96.2 ± 16.3<br>94.0<br>(83.5/106.5)       | 97.3 ± 15.0<br>99.0<br>(85.5/107.5) | 1.1 ± 5.8<br>1.0<br>(-3.0/5.5)          | 95.8 ± 13.1<br>95.5<br>(85.5/104.5)         | 97.7 ± 14.2<br>98.5<br>(85.8/107.5)   | 1.8 ± 8.0<br>1.0<br>(-4.0/7.2)       | 0.830                                   |

Abbreviations: GFR (CKD-EPI), glomerular filtration rate (Chronic Kidney Disease Epidemiology Collaboration); SD, standard deviation; Q1/Q3, first quartile/third quartile; <sup>1</sup>Intention to treat (ITT) population; *p*-Value: \*\*, *p* < 0.001; \*, *p* < 0.05 (Wilcoxon test); <sup>a</sup> Mann-Whitney U test.
