# Supplementary material for: Impact of a Specific Amino Acid Composition with Micronutrients on Well-Being in Subjects with Chronic Psychological Stress and Exhaustion Conditions: A Pilot Study
Source: MDPI journal article supplement (doi:10.3390/nu10050551), 2018-04-29
Supplement: s1 [file s1]

**Table S11.** Dietary intake at baseline and after the dietary intervention

|                              | Verum group ( <i>n</i> = 29) <sup>1</sup><br>mean ± SD |               |                | Placebo group ( <i>n</i> = 30) <sup>1</sup><br>mean ± SD |               |               | V vs. P<br><i>p</i> -Value |
|------------------------------|--------------------------------------------------------|---------------|----------------|----------------------------------------------------------|---------------|---------------|----------------------------|
|                              | Baseline                                               | Week 12       | Difference     | Baseline                                                 | Week 12       | Difference    | 12 weeks <sup>a</sup>      |
| Energy (kcal)                | 2346 ± 620                                             | 2328 ± 603    | -18 ± 306      | 2307 ± 697                                               | 2332 ± 698    | 25 ± 442      | 0.958                      |
| Protein (g)                  | 93.7 ± 34.9                                            | 93.0 ± 28.7   | -0.7 ± 23.3    | 87.7 ± 31.7                                              | 91.7 ± 34.2   | 4.0 ± 30.3    | 0.726                      |
| Carbohydrates (g)            | 244.7 ± 72.3                                           | 252.5 ± 82.5  | 7.9 ± 52.4     | 231.6 ± 65.5                                             | 243.5 ± 72.5  | 11.9 ± 55.5   | 0.934                      |
| Fat (g)                      | 98.8 ± 32.9                                            | 93.6 ± 35.2   | -5.1 ± 28.3    | 103.0 ± 41.8                                             | 97.6 ± 37.9   | -5.4 ± 24.8   | 0.946                      |
| MFA (g)                      | 33.9 ± 12.1                                            | 32.1 ± 12.4   | -1.8 ± 10.4    | 36.3 ± 14.6                                              | 32.8 ± 14.7   | -3.5 ± 10.4   | 0.378                      |
| SFA (g)                      | 41.8 ± 14.9                                            | 38.0 ± 13.8   | -3.8 ± 12.4    | 44.1 ± 21.0                                              | 43.7 ± 17.4   | -0.3 ± 14.1   | 0.384                      |
| PFA (g)                      | 15.7 ± 6.7                                             | 16.8 ± 10.7   | 1.07 ± 9.9     | 15.4 ± 8.0                                               | 14.2 ± 7.5    | -1.2 ± 5.6    | 0.346                      |
| Dietary fibers (g)           | 21.7 ± 10.6                                            | 24.7 ± 11.0   | 3.0 ± 5.3*     | 21.8 ± 8.5                                               | 19.5 ± 6.1    | -2.3 ± 6.4    | 0.001                      |
| Cholesterol (mg)             | 450.2 ± 250.6                                          | 356.5 ± 192.5 | -93.7 ± 237.4* | 383.8 ± 208.6                                            | 415.6 ± 223.3 | 31.8 ± 147.6  | 0.003                      |
| β-carotene (μg)              | 5160 ± 4867                                            | 8840 ± 14222  | 3680 ± 11931   | 4261 ± 3782                                              | 2818 ± 2544   | -1443 ± 4745  | 0.061                      |
| α-tocopherol (mg)            | 14.7 ± 7.7                                             | 15.8 ± 11.2   | 1.3 ± 11.4     | 12.8 ± 6.2                                               | 11.0 ± 5.4    | -1.8 ± 5.0*   | 0.388                      |
| Vitamin B <sub>1</sub> (mg)  | 1.39 ± 0.88                                            | 1.37 ± 0.54   | -0.02 ± 0.57   | 1.33 ± 0.60                                              | 1.25 ± 0.51   | -0.08 ± 0.55  | 0.125                      |
| Vitamin B <sub>2</sub> (mg)  | 1.80 ± 0.85                                            | 1.76 ± 0.53   | -0.04 ± 0.54   | 1.65 ± 0.60                                              | 1.70 ± 0.56   | 0.05 ± 0.53   | 0.510                      |
| Vitamin B <sub>12</sub> (μg) | 5.93 ± 3.38                                            | 6.09 ± 3.61   | 0.16 ± 2.35    | 6.19 ± 3.8                                               | 6.40 ± 4.21   | 0.21 ± 3.54   | 0.590                      |
| Vitamin C (mg)               | 129.9 ± 103.7                                          | 172.8 ± 140.3 | 42.9 ± 86.9*   | 107.4 ± 53.1                                             | 94.6 ± 63.4   | -12.8 ± 65.5  | 0.006                      |
| Folic acid (μg)              | 290.0 ± 139.7                                          | 294.6 ± 104.0 | 4.6 ± 96.1     | 250.8 ± 114.1                                            | 226.2 ± 85.3  | -24.6 ± 108.3 | 0.316                      |
| Magnesium (mg)               | 372.0 ± 109.6                                          | 399.5 ± 177.9 | 27.5 ± 90.3    | 374.8 ± 154.1                                            | 356.4 ± 120.3 | -18.4 ± 88.7  | 0.053                      |
| Calcium (mg)                 | 1029 ± 444                                             | 1071 ± 284    | 42 ± 349       | 921 ± 347                                                | 958 ± 331     | 37 ± 430      | 0.910                      |
| Zinc (mg)                    | 12.46 ± 4.87                                           | 13.01 ± 4.73  | 0.54 ± 3.69    | 12.17 ± 4.38                                             | 12.26 ± 4.98  | 0.09 ± 3.94   | 0.544                      |
| Iron (mg)                    | 13.26 ± 4.63                                           | 13.42 ± 4.86  | 0.17 ± 3.81    | 13.15 ± 4.74                                             | 12.56 ± 4.82  | -0.59 ± 4.17  | 0.344                      |
| Potassium (mg)               | 3313 ± 1173                                            | 3642 ± 1174   | 329 ± 811*     | 3196 ± 1028                                              | 3091 ± 932    | -106 ± 775    | 0.067                      |
| Phenylalanine (mg)           | 4239 ± 1462                                            | 4168 ± 1152   | -70 ± 1005     | 3927 ± 1369                                              | 4117 ± 1410   | 190 ± 1288    | 0.572                      |
| Tryptophan (mg)              | 1121 ± 407                                             | 1100 ± 335    | -21 ± 283      | 1041 ± 398                                               | 1088 ± 409    | 47 ± 360      | 0.816                      |
| Tyrosine (mg)                | 3390 ± 1244                                            | 3335 ± 1011   | -55 ± 859      | 3143 ± 1135                                              | 3311 ± 1164   | 167 ± 1063    | 0.583                      |
| Isoleucine (mg)              | 4572 ± 1805                                            | 4432 ± 1427   | -139 ± 1236    | 4198 ± 1618                                              | 4392 ± 1715   | 194 ± 1479    | 0.512                      |
| Leucine (mg)                 | 7478 ± 2762                                            | 7389 ± 2226   | -89 ± 1877     | 6955 ± 2466                                              | 7302 ± 2609   | 347 ± 2357    | 0.657                      |
| Valine (mg)                  | 5248 ± 1917                                            | 5166 ± 1584   | -82 ± 1323     | 4896 ± 1805                                              | 5097 ± 1888   | 201 ± 1645    | 0.712                      |

Abbreviations: MFA, monounsaturated fatty acids; PFA, polyunsaturated fatty acids; SD, standard deviation; SFA, saturated fatty acids; <sup>1</sup>Intention to treat (ITT) population. The dietary supplements were not included in these data; *p*-Value: \*\*, *p* < 0.001; \*, *p* < 0.05 (Wilcoxon test within groups); <sup>a</sup> Mann-Whitney U test.
