# Supplementary material for: Impact of a Specific Amino Acid Composition with Micronutrients on Well-Being in Subjects with Chronic Psychological Stress and Exhaustion Conditions: A Pilot Study
Source: MDPI journal article supplement (doi:10.3390/nu10050551), 2018-04-29
Supplement: s1 [file s1]

**Table S10.** The total PSQ<sub>30</sub> score, HOMA index, salivary cortisol, and CRP concentrations depending on different outcome measurements

|                                                                              | Group                    | Difference     | RCB     | <i>p</i> -Value |
|------------------------------------------------------------------------------|--------------------------|----------------|---------|-----------------|
| <b>Total PSQ<sub>30</sub> score depending on (age-adjusted):</b>             |                          |                |         |                 |
| Total PNF points                                                             | Verum ( <i>n</i> = 29)   | -14.3 ± 11.8   | 0.010   | < 0.001         |
|                                                                              | Placebo ( <i>n</i> = 30) | -7.0 ± 12.5    | 0.006   | 0.001           |
| Total VAS points                                                             | Verum ( <i>n</i> = 29)   | -3.3 ± 4.2     | 0.018   | 0.010           |
|                                                                              | Placebo ( <i>n</i> = 30) | -0.8 ± 5.5     | 0.012   | 0.002           |
| Δ cortisol (m – e) (ng/mL)                                                   | Verum ( <i>n</i> = 29)   | 2.34 ± 7.32    | 0.006   | 0.143           |
|                                                                              | Placebo ( <i>n</i> = 30) | -0.08 ± 7.60   | 0.002   | 0.609           |
| Energy intake (kcal)                                                         | Verum ( <i>n</i> = 29)   | -17.6 ± 306.3  | -0.0001 | 0.191           |
|                                                                              | Placebo ( <i>n</i> = 30) | 24.7 ± 442.5   | 0.0001  | 0.018           |
| Systolic blood pressure (mmHg)                                               | Verum ( <i>n</i> = 29)   | -2.7 ± 7.2     | 0.002   | 0.703           |
|                                                                              | Placebo ( <i>n</i> = 30) | -2.5 ± 7.3     | 0.005   | 0.136           |
| <b>HOMA-index depending on (age-adjusted):</b>                               |                          |                |         |                 |
| Body weight (kg)                                                             | Verum ( <i>n</i> = 29)   | 0.2 ± 1.2      | 0.177   | 0.208           |
|                                                                              | Placebo ( <i>n</i> = 30) | 0.9 ± 2.0      | 0.939   | 0.002           |
| Resting heart rate (1/min)                                                   | Verum ( <i>n</i> = 29)   | -1.4 ± 6.8     | 0.024   | 0.358           |
|                                                                              | Placebo ( <i>n</i> = 30) | 1.0 ± 9.0      | 0.227   | 0.001           |
| Total PSQ <sub>30</sub> score                                                | Verum ( <i>n</i> = 29)   | -0.192 ± 0.161 | 0.805   | 0.462           |
|                                                                              | Placebo ( <i>n</i> = 30) | -0.083 ± 0.121 | 1.146   | 0.835           |
| Folic acid (ng/mL)                                                           | Verum ( <i>n</i> = 29)   | 8.51 ± 4.38    | -0.006  | 0.882           |
|                                                                              | Placebo ( <i>n</i> = 29) | -0.55 ± 2.48   | -0.531  | 0.046           |
| <b>Salivary cortisol in the morning (ng/mL) depending on (age-adjusted):</b> |                          |                |         |                 |
| Serotonin (μg/L)                                                             | Verum ( <i>n</i> = 29)   | 1.0 ± 20.9     | 0.024   | 0.758           |
|                                                                              | Placebo ( <i>n</i> = 30) | -9.6 ± 32.4    | 0.070   | 0.037           |
| Resting heart rate (1/min)                                                   | Verum ( <i>n</i> = 29)   | -1.4 ± 6.8     | -0.157  | 0.507           |
|                                                                              | Placebo ( <i>n</i> = 30) | 1.0 ± 9.0      | -0.010  | 0.934           |
| <b>CRP (mg/L) depending on (age-adjusted):</b>                               |                          |                |         |                 |
| Magnesium (mmol/L)                                                           | Verum ( <i>n</i> = 29)   | -0.00 ± 0.04   | -33.3   | 0.040           |
|                                                                              | Placebo ( <i>n</i> = 30) | -0.03 ± 0.05   | -22.7   | 0.087           |
| L-phenylalanine (μmol/L)                                                     | Verum ( <i>n</i> = 29)   | 1.9 ± 17.9     | -0.077  | 0.031           |
|                                                                              | Placebo ( <i>n</i> = 30) | -4.6 ± 15.7    | 0.089   | 0.031           |

Abbreviations: CRP, C-reactive protein sensitive; HOMA-index, homeostasis model assessment index; PNF, Psychological Neurological Questionnaire; PSQ, Perceived Stress Questionnaire; RCB, regression coefficient B; SD, standard deviation; VAS, Visual Analogue Scales
